# Supplementary material for: Preliminary Evaluation of a Breast Cancer Screening Shared Decision-Making Aid Utilized Within the Primary Care Clinical Encounter
Source: PubMed Central journal article supplement — J Patient Exp. 2021 Jul 31;8:23743735211034039. doi: 10.1177/23743735211034039 (PMC8326620; doi:10.1177/23743735211034039), 2021-07-31
Supplement: sj-pdf-1-jpx-10.1177_23743735211034039.pdf [file sj-pdf-1-jpx-10.1177_23743735211034039.pdf]

# Appendix A Screening Mammography Decision Aid Physician Utilization Survey

**1. Approximately how many patients have you used the breast cancer screening tool with?**

- 1 to 5
- 6 to 10
- 11 or more

**2. To what degree did the tool change the way you communicated with your patients about breast cancer screening?**

- Not at all      A little      Somewhat      Very much      Extremely
- 

**3. How did the tool change the way you communicated with your patients about breast cancer screening?**

**4. When using the tool with a patient, how much time did you generally spend explaining personal risk and the benefits and harms of breast cancer screening?**

- Less than 2 minutes
- 2 to 5 minutes
- More than 5 minutes

**5. When using the tool, did it generally seem to facilitate shared decision making about mammography screening with your patients?**

- Yes
- No → Go to question 7

**6. In what ways did the tool facilitate shared decision making?**

**7. Did the breast cancer screening tool aid in eliciting patient values?**

- Yes
- No

**8. What were some challenges that made it hard for you to use the tool in the clinic, or might cause you to avoid using it in the future?**

**9. What were the things that facilitated your use of the tool in the clinic, or might cause you to continue using it in the future?**

**10. Based on your experiences with the mammography screening tool, about how many of your patients do you think would be willing to use this tool?**

- None      Very few      Some      Quite a few      Most or all

**11. About how many of your patients do you think would decline to use this tool?**

- None      Very few      Some      Quite a few      Most or all

**12. If any of your patients would decline, what do you think would be the reasons?**

**13. When using the tool, did you access the Library section for additional patient education materials?**

- Yes  
 No

**14. What additional supporting materials would help you in using this tool?**

**15. Do you have suggestions on how to make this tool easier or more effective to use within a clinical setting?**

**Thank you for completing this survey!**
